# Supplementary material for: Healthcare financing and social protection policies for migrant workers in Malaysia
Source: PubMed Central journal article supplement (PMC7725341; doi:10.1371/journal.pone.0243629), 2020-12-09

Healthcare financing and social protection policies for migrant workers in Malaysia

--Manuscript Draft--

|                                                                                                                     |                                                                                                                                                                                                                                                                                                                                                                                                                                                                                                                                                                                                                                                                                                                                                                                                                                                                                                                                                                                                                                                                                                                                                                                                                                                                                                                                                                                                                                                                                                                                                                                                                                                                                                                                                                                                                                                                                                                                                                                                                                                                                                                                                                                                                                                                                                                                                                                                   |
|---------------------------------------------------------------------------------------------------------------------|---------------------------------------------------------------------------------------------------------------------------------------------------------------------------------------------------------------------------------------------------------------------------------------------------------------------------------------------------------------------------------------------------------------------------------------------------------------------------------------------------------------------------------------------------------------------------------------------------------------------------------------------------------------------------------------------------------------------------------------------------------------------------------------------------------------------------------------------------------------------------------------------------------------------------------------------------------------------------------------------------------------------------------------------------------------------------------------------------------------------------------------------------------------------------------------------------------------------------------------------------------------------------------------------------------------------------------------------------------------------------------------------------------------------------------------------------------------------------------------------------------------------------------------------------------------------------------------------------------------------------------------------------------------------------------------------------------------------------------------------------------------------------------------------------------------------------------------------------------------------------------------------------------------------------------------------------------------------------------------------------------------------------------------------------------------------------------------------------------------------------------------------------------------------------------------------------------------------------------------------------------------------------------------------------------------------------------------------------------------------------------------------------|
| <b>Manuscript Number:</b>                                                                                           | PONE-D-20-11263                                                                                                                                                                                                                                                                                                                                                                                                                                                                                                                                                                                                                                                                                                                                                                                                                                                                                                                                                                                                                                                                                                                                                                                                                                                                                                                                                                                                                                                                                                                                                                                                                                                                                                                                                                                                                                                                                                                                                                                                                                                                                                                                                                                                                                                                                                                                                                                   |
| <b>Article Type:</b>                                                                                                | Research Article                                                                                                                                                                                                                                                                                                                                                                                                                                                                                                                                                                                                                                                                                                                                                                                                                                                                                                                                                                                                                                                                                                                                                                                                                                                                                                                                                                                                                                                                                                                                                                                                                                                                                                                                                                                                                                                                                                                                                                                                                                                                                                                                                                                                                                                                                                                                                                                  |
| <b>Full Title:</b>                                                                                                  | Healthcare financing and social protection policies for migrant workers in Malaysia                                                                                                                                                                                                                                                                                                                                                                                                                                                                                                                                                                                                                                                                                                                                                                                                                                                                                                                                                                                                                                                                                                                                                                                                                                                                                                                                                                                                                                                                                                                                                                                                                                                                                                                                                                                                                                                                                                                                                                                                                                                                                                                                                                                                                                                                                                               |
| <b>Short Title:</b>                                                                                                 | Healthcare financing and social protection policies for migrant workers in Malaysia                                                                                                                                                                                                                                                                                                                                                                                                                                                                                                                                                                                                                                                                                                                                                                                                                                                                                                                                                                                                                                                                                                                                                                                                                                                                                                                                                                                                                                                                                                                                                                                                                                                                                                                                                                                                                                                                                                                                                                                                                                                                                                                                                                                                                                                                                                               |
| <b>Corresponding Author:</b>                                                                                        | Tharani Loganathan, MD, MPH<br>UNIVERSITY OF MALAYA<br>KUALA LUMPUR, MALAYSIA                                                                                                                                                                                                                                                                                                                                                                                                                                                                                                                                                                                                                                                                                                                                                                                                                                                                                                                                                                                                                                                                                                                                                                                                                                                                                                                                                                                                                                                                                                                                                                                                                                                                                                                                                                                                                                                                                                                                                                                                                                                                                                                                                                                                                                                                                                                     |
| <b>Keywords:</b>                                                                                                    |                                                                                                                                                                                                                                                                                                                                                                                                                                                                                                                                                                                                                                                                                                                                                                                                                                                                                                                                                                                                                                                                                                                                                                                                                                                                                                                                                                                                                                                                                                                                                                                                                                                                                                                                                                                                                                                                                                                                                                                                                                                                                                                                                                                                                                                                                                                                                                                                   |
| <b>Abstract:</b>                                                                                                    | <p><b>Background</b><br/>For Malaysia, a nation highly dependent on migrant labour, the large non-citizen workforce presents a unique health system challenge. Although documented migrant workers are covered by mandatory healthcare insurance (SPIKPA), financial constraints remain a major barrier for non-citizen healthcare access. Malaysia recently extended protection for migrant workers under the national social security scheme (SOCSSO), previously exclusive to citizens. This study aims to evaluate healthcare financing and social security policies for migrant workers to identify policy gaps and opportunities for intervention.</p> <p><b>Methods</b><br/>A total of 37 in-depth interviews were conducted of 44 stakeholders from July 2018 to July 2019. A mixed-methods analysis combining major themes from qualitative interviews with policy document reviews and analysis of revenues collected at government healthcare facilities was conducted.</p> <p><b>Results</b><br/>We found that migrant workers and employers were unaware of SPIKPA enrolment and entitlements. Higher fees for non-citizens result in delayed care-seeking. While the Malaysian government nearly doubled non-citizen healthcare fees revenues from RM 104 to 182 million (USD 26 to 45 million) between 2014 to 2018, outstanding revenues tripled from RM 16 to 50 million (USD 4 to 12 million) in the same period. SPIKPA coverage is likely inadequate in providing financial risk protection to migrant workers, especially with increased non-citizens fees at public hospitals. Undocumented workers and other migrant populations excluded from SPIKPA contribution to unpaid fees revenues are unknown. Problems described with the previous Foreign Workers Compensation Scheme (FWCS), could be partially addressed by SOCSSO, in theory. Nevertheless, questions remain on the feasibility of implementing elements of SOCSSO, such as recurring payments to workers and next-of-kin overseas.</p> <p><b>Conclusion</b><br/>Malaysia is moving towards migrant inclusion with the provision of SOCSSO for documented migrant workers, but more needs to be done. Here we suggest the expansion of the SPIKPA insurance scheme to include all migrant populations, while broadening its scope towards more comprehensive coverage, including essential primary care.</p> |
| <b>Order of Authors:</b>                                                                                            | Tharani Loganathan, MD, MPH<br>Zhie X. Chan<br>Nicola Suyin Pocock                                                                                                                                                                                                                                                                                                                                                                                                                                                                                                                                                                                                                                                                                                                                                                                                                                                                                                                                                                                                                                                                                                                                                                                                                                                                                                                                                                                                                                                                                                                                                                                                                                                                                                                                                                                                                                                                                                                                                                                                                                                                                                                                                                                                                                                                                                                                |
| <b>Additional Information:</b>                                                                                      |                                                                                                                                                                                                                                                                                                                                                                                                                                                                                                                                                                                                                                                                                                                                                                                                                                                                                                                                                                                                                                                                                                                                                                                                                                                                                                                                                                                                                                                                                                                                                                                                                                                                                                                                                                                                                                                                                                                                                                                                                                                                                                                                                                                                                                                                                                                                                                                                   |
| <b>Question</b>                                                                                                     | <b>Response</b>                                                                                                                                                                                                                                                                                                                                                                                                                                                                                                                                                                                                                                                                                                                                                                                                                                                                                                                                                                                                                                                                                                                                                                                                                                                                                                                                                                                                                                                                                                                                                                                                                                                                                                                                                                                                                                                                                                                                                                                                                                                                                                                                                                                                                                                                                                                                                                                   |
| <b>Financial Disclosure</b><br>Enter a financial disclosure statement that describes the sources of funding for the | We are grateful for funding to conduct this research from the Asia Pacific Observatory on Health Systems and Policies (APO) [grant no. N/A] and the China Medical Board's Equity Initiative [IF055-2018].                                                                                                                                                                                                                                                                                                                                                                                                                                                                                                                                                                                                                                                                                                                                                                                                                                                                                                                                                                                                                                                                                                                                                                                                                                                                                                                                                                                                                                                                                                                                                                                                                                                                                                                                                                                                                                                                                                                                                                                                                                                                                                                                                                                         |

work included in this submission. Review the [submission guidelines](#) for detailed requirements. View published research articles from [PLOS ONE](#) for specific examples.

This statement is required for submission and **will appear in the published article** if the submission is accepted. Please make sure it is accurate.

#### Unfunded studies

Enter: *The author(s) received no specific funding for this work.*

#### Funded studies

Enter a statement with the following details:

- Initials of the authors who received each award
- Grant numbers awarded to each author
- The full name of each funder
- URL of each funder website
- Did the sponsors or funders play any role in the study design, data collection and analysis, decision to publish, or preparation of the manuscript?
- **NO** - Include this sentence at the end of your statement: *The funders had no role in study design, data collection and analysis, decision to publish, or preparation of the manuscript.*
- **YES** - Specify the role(s) played.

\* typeset

#### Competing Interests

Use the instructions below to enter a competing interest statement for this submission. On behalf of all authors, disclose any [competing interests](#) that could be perceived to bias this work—acknowledging all financial support and any other relevant financial or non-financial competing interests.

This statement **will appear in the published article** if the submission is accepted. Please make sure it is accurate. View published research articles from [PLOS ONE](#) for specific examples.

The funders had no role in study design, data collection and analysis, decision to publish, or preparation of the manuscript.

The authors have declared that no competing interests exist.

**NO authors have competing interests**

Enter: *The authors have declared that no competing interests exist.*

**Authors with competing interests**

Enter competing interest details beginning with this statement:

*I have read the journal's policy and the authors of this manuscript have the following competing interests: [insert competing interests here]*

\* typeset

**Ethics Statement**

Enter an ethics statement for this submission. This statement is required if the study involved:

- Human participants
- Human specimens or tissue
- Vertebrate animals or cephalopods
- Vertebrate embryos or tissues
- Field research

Write "N/A" if the submission does not require an ethics statement.

General guidance is provided below. Consult the [submission guidelines](#) for detailed instructions. **Make sure that all information entered here is included in the Methods section of the manuscript.**

Ethical approval to conduct this study was obtained from the Medical Ethics Committee, University Malaya Medical Centre and the Medical Research and Ethics Committee, Ministry of Health, Malaysia (Approval numbers: UM.TNC2/UMREC-238 and NMRR-18-1309-42043). Participant information sheets were distributed, and informed consent was obtained at recruitment. All participants agreed to be audio recorded and quoted anonymously in publications. Participants were informed that study participation was voluntary, and they would at any point, be able to refuse to answer questions or terminate the interview.

**Format for specific study types**

**Human Subject Research (involving human participants and/or tissue)**

- Give the name of the institutional review board or ethics committee that approved the study
- Include the approval number and/or a statement indicating approval of this research
- Indicate the form of consent obtained (written/oral) or the reason that consent was not obtained (e.g. the data were analyzed anonymously)

**Animal Research (involving vertebrate animals, embryos or tissues)**

- Provide the name of the Institutional Animal Care and Use Committee (IACUC) or other relevant ethics board that reviewed the study protocol, and indicate whether they approved this research or granted a formal waiver of ethical approval
- Include an approval number if one was obtained
- If the study involved *non-human primates*, add *additional details* about animal welfare and steps taken to ameliorate suffering
- If anesthesia, euthanasia, or any kind of animal sacrifice is part of the study, include briefly which substances and/or methods were applied

**Field Research**

Include the following details if this study involves the collection of plant, animal, or other materials from a natural setting:

- Field permit number
- Name of the institution or relevant body that granted permission

**Data Availability**

Authors are required to make all data underlying the findings described fully available, without restriction, and from the time of publication. PLOS allows rare exceptions to address legal and ethical concerns. See the [PLOS Data Policy](#) and [FAQ](#) for detailed information.

No - some restrictions will apply

A Data Availability Statement describing where the data can be found is required at submission. Your answers to this question constitute the Data Availability Statement and **will be published in the article**, if accepted.

**Important:** Stating 'data available on request from the author' is not sufficient. If your data are only available upon request, select 'No' for the first question and explain your exceptional situation in the text box.

Do the authors confirm that all data underlying the findings described in their manuscript are fully available without restriction?

**Describe where the data may be found in full sentences. If you are copying our sample text, replace any instances of XXX with the appropriate details.**

- If the data are **held or will be held in a public repository**, include URLs, accession numbers or DOIs. If this information will only be available after acceptance, indicate this by ticking the box below. For example: *All XXX files are available from the XXX database (accession number(s) XXX, XXX).*
- If the data are all contained **within the manuscript and/or Supporting Information files**, enter the following:  
*All relevant data are within the manuscript and its Supporting Information files.*
- If neither of these applies but you are able to provide **details of access elsewhere**, with or without limitations, please do so. For example:

*Data cannot be shared publicly because of [XXX]. Data are available from the XXX Institutional Data Access / Ethics Committee (contact via XXX) for researchers who meet the criteria for access to confidential data.*

*The data underlying the results presented in the study are available from (include the name of the third party*

All relevant data are within the manuscript and its Supporting Information files.

*and contact information or URL).*

- This text is appropriate if the data are owned by a third party and authors do not have permission to share the data.

\* typeset

Additional data availability information:

1 **Title page**

2 **Healthcare financing and social protection policies for migrant workers in**  
3 **Malaysia**

4 Tharani Loganathan<sup>1\*#a</sup>, Zhie X Chan<sup>2</sup>, Nicola Pocock<sup>2, 3¶</sup>.

5

6 <sup>1</sup> Centre for Epidemiology and Evidence-based Practice, Department of Social and Preventive  
7 Medicine, University of Malaya, Kuala Lumpur, Malaysia

8 <sup>2</sup>United Nations University - International Institute for Global Health (UNU-IIGH), Kuala  
9 Lumpur, Malaysia.

10 <sup>3</sup>Gender Violence & Health Centre, London School of Hygiene and Tropical Medicine,  
11 London, United Kingdom.

12 <sup>#a</sup> **Corresponding Author:**

13 Tharani Loganathan

14 Centre for Epidemiology and Evidence-based Practice,

15 Department of Social and Preventive Medicine, Faculty of Medicine, University of Malaya,

16 50603 Kuala Lumpur, Malaysia.

17 E-mail: drtharani@ummc.edu.my (TL)

## 18 **Abstract**

### 19 **Background**

20 For Malaysia, a nation highly dependent on migrant labour, the large non-citizen workforce  
21 presents a unique health system challenge. Although documented migrant workers are  
22 covered by mandatory healthcare insurance (SPIKPA), financial constraints remain a major  
23 barrier for non-citizen healthcare access. Malaysia recently extended protection for migrant  
24 workers under the national social security scheme (SOCSO), previously exclusive to citizens.  
25 This study aims to evaluate healthcare financing and social security policies for migrant  
26 workers to identify policy gaps and opportunities for intervention.

### 27 **Methods**

28 A total of 37 in-depth interviews were conducted of 44 stakeholders from July 2018 to July  
29 2019. A mixed-methods analysis combining major themes from qualitative interviews with  
30 policy document reviews and analysis of revenues collected at government healthcare  
31 facilities was conducted.

### 32 **Results**

33 We found that migrant workers and employers were unaware of SPIKPA enrolment and  
34 entitlements. Higher fees for non-citizens result in delayed care-seeking. While the Malaysian  
35 government nearly doubled non-citizen healthcare fees revenues from RM 104 to 182 million  
36 (USD 26 to 45 million) between 2014 to 2018, outstanding revenues tripled from RM 16 to  
37 50 million (USD 4 to 12 million) in the same period. SPIKPA coverage is likely inadequate  
38 in providing financial risk protection to migrant workers, especially with increased non-  
39 citizens fees at public hospitals. Undocumented workers and other migrant populations  
40 excluded from SPIKPA contribution to unpaid fees revenues are unknown. Problems  
41 described with the previous Foreign Workers Compensation Scheme (FWCS), could be



42 partially addressed by SOCSO, in theory. Nevertheless, questions remain on the feasibility of  
43 implementing elements of SOCSO, such as recurring payments to workers and next-of-kin  
44 overseas.

## 45 **Conclusion**

46 Malaysia is moving towards migrant inclusion with the provision of SOCSO for documented  
47 migrant workers, but more needs to be done. Here we suggest the expansion of the SPIKPA  
48 insurance scheme to include all migrant populations, while broadening its scope towards  
49 more comprehensive coverage, including essential primary care.

50

## 51 **Key Words**

52 migrant health; health insurance; social security; access to health; right to health; Malaysia;  
53 South-East Asia.

## 54 **Introduction**

55 Global migration for work is the largest driver of international migration with 164 million  
56 migrant workers estimated in 2017, accounting for nearly two-thirds of all international  
57 migrants [1, 2]. International commitment towards protecting migrant workers' rights is  
58 embodied in the 2018 Global Compact for Safe, Orderly and Regular Migration [3].

59 Although health systems have pledged to ensure 'no one is left behind' and to achieve  
60 Universal Health Coverage with the 2030 Agenda for Sustainable Development, the health of  
61 migrant populations are often overlooked [4, 5].

62 Malaysia is an upper-middle income nation dependant on migrant labour, with migrant  
63 workers shouldering employment in low-skilled jobs that citizens are reluctant to perform.

64 Migrant workers are employed in five major, labour-intensive sectors: manufacturing,  
65 construction, services, plantations and agriculture [6]. The Ministry of Home Affairs  
66 estimates two million documented migrant workers in Malaysia in 2019 [7]. Others estimate  
67 up to 5 million migrant workers including undocumented workers in the country, or nearly a  
68 sixth of Malaysia's population of 32 million, presenting a unique challenge to the health  
69 system [8].

70 Malaysia has been lauded as having achieved Universal Health Coverage with its tax-  
71 financed public healthcare system provided mainly by the Ministry of Health (MOH),  
72 Malaysia [9]. While fees at public healthcare facilities are highly subsidised for citizens, non-  
73 citizens' fees have been substantially increased, reflecting healthcare rationing [10, 11].

74 Despite the introduction of the Foreign Worker Hospitalization and Insurance Scheme  
75 (SPIKPA) to provide migrant workers with financial risk protection against healthcare  
76 expenditure incurred with inpatient care or surgery at MOH hospitals, financial constraints  
77 remain a considerable obstacle towards healthcare access in Malaysia [12, 13].

78 The provision of social security for workers in Malaysia has until recently been inherently  
79 unequal, with migrant workers covered against workplace accidents by the Workmen's  
80 Compensation Act 1952 (Act 273), while citizens receive protection under the Employees'  
81 Social Security Act, 1969 (Act 4) [14-16]. In a shift towards migrant inclusion, the Malaysian  
82 government placed migrant workers' social security protections with the national social  
83 security organisation (SOCSO) commencing January 2019.

84 In this paper, we examine the evolution of healthcare policy for migrant workers in Malaysia,  
85 while evaluating healthcare financing and social security policies and other options for fiscal  
86 space, in order to identify gaps and opportunities to improve migrant health financing and  
87 coverage.

88

## 89 **Materials and Methods**

### 90 **Study design**

91 Policy document review and thematic analysis of qualitative interviews were combined with  
92 quantitative data analysis to evaluate healthcare financing and social security policies for  
93 migrant workers. A mixed-methods analysis which combined major themes from interview  
94 data with policy analysis and quantitative data analysis is presented in an integrated form in  
95 the Results section.

### 96 **Definition of terms**

97 Documented and undocumented migrant workers, commonly called ‘foreign workers’ in  
98 Malaysia are the population of interest in this study. Non-citizens are a wider umbrella term,  
99 which includes other migrant populations like refugees, asylum seekers, victims of trafficking  
100 and expatriates, that are not the primary focus of this study.

101 We define a migrant worker as a person who crosses international borders for employment.  
102 Documented or regular migrants possess legal documents such as passports and work permits  
103 and are authorised to enter, reside and partake in employment in the country. Undocumented  
104 or irregular migrants do not have the required legal documents or authorisation to enter,  
105 reside or be employed in the country officially [17, 18].

### 106 **Data collection and analysis**

107 For the document review, Malaysian health and labour laws, policy documents, guidelines  
108 and circulars relating to healthcare delivery to migrants, and reports of local and international  
109 organisations concerning migrant health were retrieved and analysed.

110 For the qualitative component, data collection was conducted from July 2018 to July 2019.  
111 Semi-structured interview guides were developed, and questions were adapted depending on

112 the participants' organisational backgrounds and knowledge. Participants were sampled  
 113 purposively using an initial sampling frame from a migrant health stakeholder workshop [19].  
 114 Further recruitment was done by participant referral and purposefully identifying  
 115 stakeholders through LinkedIn. Interviews were conducted until theoretical saturation was  
 116 reached.

117 We conducted 37 in-depth interviews of 44 individuals including those from civil society and  
 118 international organisations, trade unions, academia, industry, as well as medical doctors,  
 119 migrant workers and other policy stakeholders (Table 1). Study participants were involved in  
 120 case management, legal aid, employment, training, research or medical service provision for  
 121 migrant workers. We interviewed migrant workers and their representatives from major  
 122 migrant-sending countries like Indonesia, Bangladesh, Nepal and the Philippines. The  
 123 medical professionals interviewed were doctors working in public and private healthcare  
 124 facilities and civil society organisation (CSO) clinics providing free healthcare to non-  
 125 citizens.

126 **Table 1. Characteristics of the study participants (n = 44)**

| <b>Participant Background</b>          | <b>Label</b> | <b>No.</b> |
|----------------------------------------|--------------|------------|
| Medical Doctor                         | MD           |            |
| Public                                 |              | 4          |
| Private                                |              | 6          |
| Civil society organisation             |              | 3          |
| Civil society organisation             | CSO          | 10         |
| Industry                               | IND          | 5          |
| Migrant worker <sup>1</sup>            | MW           | 4          |
| International organisation             | IO           | 4          |
| Trade union                            | TU           | 3          |
| Academia                               | AC           | 3          |
| Other policy stakeholders <sup>2</sup> | POL          | 2          |
| <b>Total</b>                           |              | <b>44</b>  |

127 <sup>1</sup> Only 1 of the 4 migrant workers interviewed identified himself as a worker only. Others  
 128 were also members of civil society organisations (2) or trade unions (1).

129 <sup>2</sup> Government or government-linked organisation

130

131 Interviews were conducted in English and Bahasa Malaysia (Malay language), by the  
132 research team (TL, ZC and NP). Audio recordings were transcribed verbatim. Audio  
133 recordings and electronic transcripts were stored in secure data servers, while printed  
134 transcripts and notes were stored in a locked cupboard. Data were analysed thematically in an  
135 immersive, exploratory and inductive manner [20]. Transcripts were coded into emerging  
136 themes using NVivo 12 separately by TL and ZC. Codes and themes were refined by  
137 repeated readings of transcripts and regular discussions, giving due attention to negative  
138 themes and minor quotes. Interviews in Bahasa Malaysia were analysed in the same  
139 language, while extracted quotations were translated for publication.

140 For the quantitative component, we analysed published data on medical revenues collected  
141 and outstanding revenues in accordance with the Fees Act 1951, for both citizens and non-  
142 citizens at Ministry of Health healthcare facilities. This data was sourced from the Ministry of  
143 Health, Malaysia Annual Reports from 2008 to 2018 [21]. This analysis aimed to examine  
144 changes in revenues collected and outstanding revenues alongside the evolving financial  
145 policies in Malaysia. Publicly available data on other migrant-related charges and taxes,  
146 including annual levies which employers are required to pay for the employment of migrant  
147 workers, were also analysed.

148 All costs are reported in Malaysian Ringgit (RM) and United States Dollars (USD), using the  
149 2018 World Bank exchange rate of 4.04 [22].

## 150 **Ethics**

151 Participant information sheets were distributed, and informed consent was obtained at  
152 recruitment. All participants agreed to be audio recorded and quoted anonymously in  
153 publications. Participants were informed that study participation was voluntary, and they  
154 would at any point, be able to refuse to answer questions or terminate the interview.

155 Interviews were primarily conducted by a medical doctor (TL) and academic researchers  
156 (ZC, NP) respectively. Interviewers were likely to be viewed as trusted authority figures,  
157 particularly with migrant workers. As described elsewhere [12], interviews were conducted at  
158 locations and times of study participants choice, to minimise the effects of social position and  
159 power imbalances. Migrant participants, in particular, were assured that they could refuse to  
160 answer questions or to end the interview at any time. In doing so, we hoped that participants  
161 felt that they could exert a degree of control over the interview process [12].

162 Ethical approval to conduct this study was obtained from the Medical Ethics Committee,  
163 University Malaya Medical Centre and the Medical Research and Ethics Committee, Ministry  
164 of Health, Malaysia (Approval numbers: UM.TNC2/UMREC-238 and NMRR-18-1309-  
165 42043).

## 166 **Results**

### 167 **Evolution of migrant healthcare and social security policies in Malaysia**

168 Healthcare policy for migrants in Malaysia has unfolded rapidly over the past two decades  
169 but remains centred primarily on security and sovereignty. See Fig 1 for the evolution of  
170 major migrant healthcare and social security policies in Malaysia from 2001 to the present  
171 day.

#### 172 **Fig 1: Timeline of the evolution of healthcare and social security policies for migrant** 173 **workers in Malaysia**

174 Sourced from [23] and [24]

175 In 2001, the offices of the Director General of Health released guidelines for the reporting of  
176 undocumented migrants seeking care at MOH clinics and hospitals [25]. Health workers were  
177 reminded of their duty as civil servants to report undocumented migrants including children,  
178 migrant workers, refugees and asylum seekers, to the police per the Immigration Act  
179 1959/1963 (amend 1997)[26]. The circular explained the rationale for this policy in two  
180 ways. Firstly, non-citizens were framed as a potential national security threat requiring  
181 collective action. Secondly, non-citizens were seen as taking up a large portion of the MOH  
182 budget meant for Malaysian citizens [13].

183 Keeping with the justification of scarcity of healthcare resources and rationing of services  
184 delivered to non-citizens, the Malaysian government began phasing out subsidised healthcare  
185 for non-citizens by imposing increased medical fees to non-citizens with the enforcement of  
186 Fees (Medical) (Cost of Services) Order 2014 (Table 2) [10, 12, 27]. Initially, the fee increase  
187 was to be implemented incrementally over four years, starting in January 2015. However, full  
188 non-citizen fees were enforced from January 2016, ahead of the initial target of 2018 [28].



189 Furthermore, except for certain exemptions, medication prescribed to non-citizens for the  
190 treatment of non-communicable diseases would only be supplied for 5 days at public  
191 facilities. A notable exemption to this policy is for the treatment of 7 infectious diseases,  
192 justified as a measure to protect Malaysian citizens from the threat of communicable disease  
193 among migrants [29].

194 In a somewhat unprecedented move, the Malaysian government announced that the Foreign  
195 Workers Compensation Scheme (FWCS), which primarily addressed accident compensation  
196 and repatriation in case of death, would be phased out in favour of migrant inclusion in the  
197 Social Security Scheme (SOCSO) from January 2019, on near parity terms with Malaysian  
198 citizens. SOCSO includes health provision for occupational injuries and disease, including  
199 free treatment at SOCSO panel clinics and government hospitals [24].

200 Study participants identified several challenges and policy gaps for migrant workers seeking  
201 care in Malaysia related to the evolving legal and policy framework since 2001, relevant for  
202 healthcare financing and social security. We describe the major challenges and gaps in  
203 healthcare financing and social security policies in the next sections. Health protection  
204 schemes for healthcare financing and social security available for migrant workers in  
205 Malaysia are detailed in Table 3.

206 **Table 2: Charges for Malaysian citizens and non-citizens at public clinics and hospitals**

|                                     | MALAYSIAN CITIZEN      |                            | NON- CITIZEN <sup>1,2</sup> |                         |                                   |
|-------------------------------------|------------------------|----------------------------|-----------------------------|-------------------------|-----------------------------------|
| <b>Ward Deposit</b>                 | <b>Medical</b>         | <b>Surgical</b>            | <b>Medical</b>              | <b>Surgical</b>         | <b>Obstetrics and Gynaecology</b> |
| 1st Class                           | RM 700<br>(USD 173)    | RM 1,100<br>(USD 273)      | RM 7,000<br>(USD 1735)      | RM 11,000<br>(USD 2726) | RM 7,000<br>(USD 1735)            |
| 2nd Class                           | RM 200<br>(USD 50)     | RM 400<br>(USD 99)         | RM 3,000<br>(USD 99)        | RM 5,000<br>(USD 1239)  | RM 5,000<br>(USD 1239)            |
| 3rd Class                           | RM 20<br>(USD 5)       | RM 30<br>(USD 7)           | RM 1,400<br>(USD 347)       | RM 2,800<br>(USD 694)   | RM 2,800<br>(USD 694)             |
| <b>Daily Ward Charges</b>           | <b>Air-conditioned</b> | <b>Non Air-conditioned</b> |                             |                         |                                   |
| 1st Class                           |                        |                            |                             |                         |                                   |
| 1 bedded room                       | RM 120<br>(USD 30)     | RM 90<br>(USD 22)          | RM 320<br>(USD 79)          |                         |                                   |
| 2 bedded room                       | RM 90<br>(USD 22)      | RM 60<br>(USD 15)          | RM 240<br>(USD 59)          |                         |                                   |
| 4 bedded room                       | RM 60<br>(USD 15)      | RM 45<br>(USD 11)          | RM 200<br>(USD 50)          |                         |                                   |
| 2nd Class                           | RM 40<br>(USD 10)      | RM 25<br>(USD 6)           | RM 180<br>(USD 45)          |                         |                                   |
| 3rd Class                           | RM 3<br>(USD 1)        | RM 3<br>(USD 1)            | RM 160<br>(USD 40)          |                         |                                   |
| <b>In-Patient Treatment Charges</b> |                        |                            |                             |                         |                                   |
| 1st Class                           | RM 15<br>(USD 4)       |                            | RM 100<br>(USD 25)          |                         |                                   |
| 2nd Class                           | RM 5<br>(USD 1)        |                            |                             |                         |                                   |
| 3rd Class                           | Free                   |                            |                             |                         |                                   |

**Out-Patient Treatment Charges**

|                        |                    |                    |
|------------------------|--------------------|--------------------|
| Out-Patient Department | RM 1<br>(USD 0.25) | RM 40<br>(USD 10)  |
| Specialist Clinic      | RM 5<br>(USD 1.24) | RM 120<br>(USD 30) |

---

207 NOTE. All medical charges are reported in Malaysian Ringgit (RM) and United States Dollars (USD).

208 <sup>1</sup> Treatment charges for non-citizens do not include investigation, procedure or medication

209 <sup>2</sup> Exception is given to non-citizens with Permanent Residence status

210 Source: Official Website of Hospital Kuala Lumpur. Ministry of Health (11)

211 **Table 3. Health Protection Schemes for Foreign Workers in Malaysia**

| Insurance/Protection Scheme                          | Established                   | Provision                                                            | Basic Mechanism                                                                                                                                                                                                                                                                                                                                           | Strengths                                                                                                                                                                                                                                                                                                                                                                                                          | Weaknesses                                                                                                                                                                                                                                                                                                                                                               |
|------------------------------------------------------|-------------------------------|----------------------------------------------------------------------|-----------------------------------------------------------------------------------------------------------------------------------------------------------------------------------------------------------------------------------------------------------------------------------------------------------------------------------------------------------|--------------------------------------------------------------------------------------------------------------------------------------------------------------------------------------------------------------------------------------------------------------------------------------------------------------------------------------------------------------------------------------------------------------------|--------------------------------------------------------------------------------------------------------------------------------------------------------------------------------------------------------------------------------------------------------------------------------------------------------------------------------------------------------------------------|
| SPIKPA: Foreign Workers' Insurance Protection Scheme | January 2011                  | Immigration (Department of Labour, MOHA) & Health Policy (MOH)*      | <ul style="list-style-type: none"> <li>• Private Insurance from 25 providers</li> <li>• Covers hospitalisation and surgical charges at Public Hospitals (MOH)</li> <li>• RM 120 (USD 30) per annum; paid by the worker</li> <li>• Annual limit of up to RM 10,000 (RM 20,000 from end 2016) (increased from USD 2500 to USD 5000 in 2016)</li> </ul>      | <ul style="list-style-type: none"> <li>• Cashless</li> <li>• No deposit required upon checking into the hospital (E-System)</li> <li>• Designed to reduce the financial burden of the employers</li> </ul>                                                                                                                                                                                                         | <ul style="list-style-type: none"> <li>• Low awareness of entitlements</li> <li>• Does not cover outpatient services</li> <li>• Does not cover plantation and domestic workers</li> <li>• Although there was an increase in annual limit, this is insufficient for management of severe cases or those requiring long-term care</li> </ul>                               |
| FWCS: Foreign Worker Compensation Scheme             | 1998 – 2019**                 | Section 26 (2) of Workmen's Compensation Act 1952 (Amended Aug 1996) | <ul style="list-style-type: none"> <li>• 26 private insurers</li> <li>• RM 72 (USD 18) per annum; paid by the employer, without any salary deduction</li> <li>• Lump-sum compensation, no more than RM 23,000 (USD 5,700) for injuries and RM 25,000 (USD 6,196) for death</li> <li>• Labour Commissioner will assess all compensation payable</li> </ul> | <ul style="list-style-type: none"> <li>• 'No fault' compensation</li> <li>• Covers injuries, occupation diseases and fatalities related to employment</li> <li>• It is an offence for employers to deduct FWCS premium from workers' salary</li> </ul>                                                                                                                                                             | <ul style="list-style-type: none"> <li>• Relies on the employer to make the claims</li> <li>• Claim process can take time and delay access to the funds required for emergencies</li> <li>• If employers advanced payment of medical bills, then the amount will be deducted from compensation received</li> </ul>                                                       |
| SOCSSO: Social Security Organisation                 | 1971-1993/<br>January 2019*** | Employees' Social Security Act 1969 (Act 4)                          | <ul style="list-style-type: none"> <li>• Employment Injury Scheme (EIS)</li> <li>• 2019 is a 'cooling-off period' for the switch from FWCS to SOCSSO</li> <li>• Contribution rate is the same as citizens: 1.25% of the insured monthly wages; paid by the employer</li> </ul>                                                                            | <ul style="list-style-type: none"> <li>• 'No fault' compensation</li> <li>• Aims to achieve near equal coverage as citizens</li> <li>• Workers to receive support until full recovery, including rehabilitation and disablement benefits</li> <li>• Dependents to receive benefits</li> <li>• Onus is on the employer to contribute, but SOCSSO claims can be made even if employer fails to contribute</li> </ul> | <ul style="list-style-type: none"> <li>• Does not cover domestic workers</li> <li>• Migrant workers not covered under the Invalidity Pension Scheme</li> <li>• Workers are not entitled to education loan benefit, vocational training, dialysis treatment or return to work programme (citizen only)</li> <li>• Exact implementation is yet to be made known</li> </ul> |

212 \* There is no legal provision for SPIKPA. SPIKPA provision is written in policy documents [13].

213 \*\* Migrant workers were included in SOCSO between 1971 to 1993. In 1996 the Workmen's Compensation Act was amended to specify coverage of migrant workers. In 1998, the FWCS, a  
214 private insurance scheme was established to provide social security insurance coverage for migrant works.

215 \*\*\*Since January 2019, migrant workers were re-included in SOCSO on near parity terms with citizens.

216

## 217 **Challenges with healthcare financing for migrant workers**

218 SPIKPA is a mandatory health insurance for migrant workers introduced since January 2011  
219 by the government of Malaysia to alleviate the burden of unpaid bills on the Malaysian public  
220 healthcare system, while providing migrant workers with financial risk protection against  
221 excessive out-of-pocket healthcare payments. The SPIKPA scheme is mandatory for all  
222 documented migrant workers, except domestic and plantation workers, as a necessary pre-  
223 requisite for the issuance or renewal of work permits. SPIKPA is a private insurance policy  
224 provided by 25 different insurers, with an annual premium of RM120 (USD 30) per migrant  
225 worker. The annual coverage of RM10,000 (USD 2,478) was increased to a maximum of  
226 RM20,000 (USD 4,956), presumably in keeping with the increase of non-citizen fees at  
227 public hospitals. The SPIKPA scheme provides hospitalisation and surgical benefits at public  
228 hospitals during employment, while outpatient care, healthcare for pregnancy and attempted  
229 suicide or self-harm are excluded. SPIKPA has a 'cashless', e-system, that exempts insured  
230 migrant workers from payment of deposits or producing guarantee letters from employers.  
231 According to policy wording, insured migrant workers are only required to produce their  
232 passport for identity verification at hospital registration counters [13, 30]. (Table 3)

### 233 **Qualitative 1: Lack of awareness of SPIKPA and limited uptake**

#### 234 **Lack of awareness and no insurance card**

235 Most interviewed were concerned that SPIKPA, although compulsory, does not provide  
236 insurance cards or documents, as such workers and their employers are unaware of insurance  
237 provisions and eligibilities. This is perceived as unfair as workers are forced to pay the annual  
238 premiums, but many are reluctant to seek needed care as they were unaware of insurance  
239 provisions.

## Results

240 *"Normally, [when] we have [an] insurance policy, at least we should know [ how it works].*  
241 *We should have documents showing that we have this policy. But in the situation of migrant*  
242 *workers, most of them, they don't have it. They don't have the information [because] they are*  
243 *not given the information. "* CSO-9

244 Those interviewed shared that by not having a card, workers were unsure whether they were  
245 covered by health insurance. This interviewee informed of difficulties in claiming insurance,  
246 as migrant workers are unsure if they were insured or of their entitlements and the required  
247 processes for making a claim.

248 *"She got the insurance, [...] but when she got hospitalized, there was no proper insurance*  
249 *card for her. She went to the [XX public] hospital. And then, she had to pay deposits up to*  
250 *her discharge, everything she had to pay. The employer didn't [get] involved at all, and she*  
251 *didn't know how to claim. So, everything she had to borrow right and left, to settle the bill, in*  
252 *order to get the check-up."* IO-1

253 Interviewees informed that most migrant workers do not utilise the insurance, as the SPIKPA  
254 insurance does not pay for the more commonly sought outpatient treatment at private clinics.

255 *"It is only when there is an accident or when there is surgery or hospitalization, then you*  
256 *have access, other than that, there is almost totally no care. They lack the awareness and of*  
257 *course, when they go to public hospitals, the fees are quite high, so that kind of discourages*  
258 *them."* CSO-1

### 259 **Employer uptake of SPIKPA is unclear**

260 While both workers and employers are responsible for the payment of hospital bills when the  
261 SPIKPA limit is exceeded, employers must ensure that arrears are paid, or risk being  
262 blacklisted from recruiting new migrant workers. This industry stakeholder expressed that  
263 purchasing health insurance is crucial in protecting employers from unexpected medical bills.

## Results

264 *"I just followed all the requirements by KDN (The Home Ministry); because I don't want*  
265 *[the] company to spend more money for medical, for the foreign worker. That is why I buy*  
266 *the insurance, yeah."* IND-4

267 Although the SPIKPA insurance scheme is a government policy, it is not governed by law.  
268 Some interviewed questioned the enforcement of SPIKPA purchase for migrant workers.

269 *"In many situations, even though it is part of the conditions by the Malaysian Home Affairs*  
270 *or the government, employers don't buy this insurance, but the work permit is still issued."*

271 IO-1

272 **Qualitative 2: Increased non-citizen fees at public healthcare facilities discourages care-**  
273 **seeking**

274 **Higher prices lead to healthcare avoidance**

275 Interviewees shared that the removal of healthcare subsidies for non-citizens has resulted in  
276 healthcare avoidance among migrant workers, putting population health at risk.

277 *"When they removed the subsidy, that was not a very good idea. The migrant thinks it is a*  
278 *high cost. If I don't have enough money, then I won't seek treatment. So, that puts everyone*  
279 *at a higher risk."* CSO-1

280 This interviewee shared that undocumented workers are particularly vulnerable to the  
281 increase in medical fees, as they are not covered by the SPIKPA insurance.

282 *"They [undocumented workers] just get emergency treatment. Like if the leg is broken or*  
283 *something. They [healthcare workers] just give like temporary treatment, because they*  
284 *cannot afford the bills. Because for the migrant workers, the charges are 200% more*  
285 *expensive. It is very expensive"* MW-1

286 **Differential charges for non-citizens perceived to be unfair**



## Results

287 One interviewee felt that the increased medical charges were unfair as workers contribute to  
288 the Malaysian economy through the payment of the annual levy.

289 *"I think the charges should be lowered. Don't discriminate because we are also in Malaysia.*  
290 *For migrant workers, we are not free here. We also have to pay tax to the government with*  
291 *the levy. The levy - one year is RM1,850! We also give contribution to the Malaysia economy.*  
292 *So, why they discriminate [against] us?" MW-1*

293 While employers are responsible for the payment of levies in policy, in practice levy costs are  
294 often deducted from migrant workers' pay.

### 295 **Subsidy for foreign workers removed because of the scarce national budget on health**

296 The steep fee increases for non-citizens were prompted by perceptions that non-citizens took  
297 up too much of the healthcare budget. This medical practitioner explained that the ideals of  
298 Universal Health Coverage were impractical, in times of financial scarcity.

299 *"So, these questions of treating foreign workers and advocating for Universal [Health]*  
300 *Coverage [are] all well respected; but you know, our budget for the MOH is very limited.*  
301 *And the foreign workers only until recently were given free treatment, with a very minimum*  
302 *amount charged. Only recently, [did] the government decide that they [foreign patients] were*  
303 *biting into our budget. So, the direction and directives were given by the MOH that they*  
304 *should be charged [appropriately]." MD-5*

305 He went on to state that employers should take more responsibility in providing healthcare  
306 for workers.

### 307 **Qualitative 3: Inadequate benefits package and coverage of insurance, especially after** 308 **the increase in non-citizen fees**

## Results

309 Most interviewed felt that the SPIKPA insurance is inadequate in covering costs of medical  
310 treatment, especially following the increase in non-citizen fees at public hospitals. This  
311 interviewee explained this may be the reason migrant workers are sent back to home  
312 countries after workplace injuries, without receiving adequate medical care in Malaysia.

313 *“If you want to give insurance, you [should] give insurance that is in par with Malaysians,*  
314 *you know, Malaysians can get up to RM200,000 to RM500,000 a year. And then we can go to*  
315 *private hospital, it can cover, you know? Public hospitals is almost like free for us already.*  
316 *But, for foreign nationals, it is very high. You know, the cost of giving birth is high, the cost*  
317 *of surgery is high, and hospitalization is very high. But then, the insurance is so low. I think*  
318 *the care for them is not there. They cannot get proper care because the insurance doesn't*  
319 *cover it. So, where we see workers are injured, for example, if they work in a factory and*  
320 *their fingers are cut [...] they lose their fingers [and] we see employers sending them back.”*

321 CSO-2

322 According to policy, SPIKPA places the responsibility of healthcare payments upon both the  
323 worker and employer. In theory, the worker and employer mutually decide who pays for  
324 annual premiums. Both are also responsible for additional hospital charges after medical bills  
325 exceed the insurance ceiling, as workers are unable to renew the annual work permit for  
326 further employment and employers blacklisted by the Immigration Department thus unable to  
327 hire new migrant workers, as a consequence of unpaid hospital bills. In practice, however,  
328 workers inevitably bear the burden of paying insurance premiums and excess medical bills.

329 *“Having this insurance scheme helps in some ways. But it is very limited, and the amount of*  
330 *insurance coverage is very little. And the worker has to pay for it [pays the premium], except*  
331 *for the plantation and domestic workers [for which] the employer pays. But, other than that,*  
332 *it is the worker who pays for the injuries.” IO-2*

## Results

333 Furthermore, domestic and plantation workers are excluded from mandatory SPIKPA  
334 enrolment, with the responsibility of paying for healthcare placed with the employer. Here,  
335 employers could opt to pay directly for healthcare or to enrol these categories of workers into  
336 SPIKPA or private insurance schemes.

### 337 **Is the SPIKPA coverage adequate?**

338 We examined data on annual revenues collected by the MOH and outstanding revenues for  
339 health services at MOH healthcare facilities under the Fees Act (1951), for citizens and non-  
340 citizens from 2008 to 2018. We found that since the 2014 revision of the Fees Act (1951),  
341 annual revenues for medical fees collected from non-citizens nearly doubled, from RM 104  
342 million (USD 26 million) in 2014 to RM 182 million (USD 45 million) in 2018, nearing the  
343 RM 217 million (USD 54 million) collected from citizens in 2018. Not surprisingly,  
344 outstanding revenues for non-citizens tripled during the same period from RM16 million  
345 (USD 4 million) in 2014 to RM 50 million (USD 12 million) in 2018 (Fig 2).

### 346 **Fig 2: Revenue collected and outstanding revenue for health services under the Fees Act** 347 **1951 by citizenship status, 2008-2018**

348 Source: Annual Report, Ministry of Health, 2008 – 2018. [21]

349 While the arrears may have been contributed by undocumented migrants without insurance  
350 incurring healthcare payments they cannot afford to pay, these findings in addition to the  
351 qualitative evidence of financial barriers to healthcare access, raises questions on the  
352 adequacy of the SPIKPA insurance in providing financial risk protection to migrant workers.

353 Importantly, we were unable to differentiate out-of-pocket contributions of documented  
354 migrant workers who had exceeded the SPIKPA threshold, undocumented workers and other  
355 migrant populations without health insurance. Limitations of this estimation are mainly due  
356 to the aggregated nature of the MOH data used in this analysis. Non-citizens here include

## Results

357 documented and undocumented migrant workers, refugees, asylum seekers, expatriates,  
358 foreign students, tourists and medical tourists. We propose that a more detailed analysis of  
359 individual patient data by these different categories of non-citizens, be conducted in future to  
360 examine the change of utilisation patterns of health services and expenditure of non-citizens  
361 with changes in healthcare policy.

### 362 **Challenges with the evolving social security scheme for migrant workers**

363 SOCSO, the national social security scheme in Malaysia is named after the government  
364 agency established to provide social security to workers under the Employees' Social  
365 Security Act, 1969 (Act 4)[14]. SOCSO which provides insurance to citizens against  
366 workplace accidents also covered migrant workers from its establishment in 1971 until 1993.  
367 However, since April 1993, migrant workers were exempted from SOCSO and were given  
368 protection against occupational disease, and injury and death related to employment under the  
369 Workmen's Compensation Act 1952 (Act 273) (WCA). The WCA, a colonial-era legislation  
370 enforced by the Department of Labour under the Ministry of Human Resources, was  
371 amended in 1996 to provide social security indemnity for migrant workers. Employers were  
372 required to insure migrant workers under the FWCS established in 1998. The FWCS is sold  
373 by 26 private insurers with annual premiums of RM 72 (USD 18) per migrant worker paid for  
374 by employers and providing maximum lump-sum compensations of RM23,000 (USD 5,700)  
375 for injuries and RM 25,000 (USD 6,196) for death related to employment, which includes  
376 repatriation but not medical expenses [30, 31].

377 The Malaysian government through the ratification of ILO Equality of Treatment (Accident  
378 Compensation) Convention 1925 (No. 19) made an international commitment towards the  
379 equality of treatment of citizens and non-citizen workers in terms of accident compensation  
380 for occupational injury and industrial accidents [32, 33]. Towards this end, SOCSO was

## Results

381 reintroduced for migrant workers starting January 2019, offering the Foreign Workers  
382 Employment Injury Scheme (EI Scheme) with similar protections as citizens. All documented  
383 migrant workers in Malaysia, except domestic workers, are eligible for SOCSO. While  
384 migrant workers newly recruited in 2019 would be automatically covered under SOCSO's EI  
385 Scheme, existing migrant workers would receive EI coverage upon the expiry of their FWCS  
386 coverage. Thus 2019 is considered a 'cooling-off' period before the full enforcement of  
387 SOCSO. The SOCSO contribution rate for migrant workers is the same as citizens, with  
388 employers responsible for the payment of the monthly contribution of 1.25% of the insured  
389 migrant workers' monthly wages [24, 34].

390 The EI Scheme provides superior protection for migrant workers compared to FWCS and  
391 while there isn't absolute parity with citizens, it is seen as a step forward. Under the EI  
392 Scheme, migrant workers would receive medical, temporary and permanent disablement,  
393 dependants, funeral, and rehabilitation benefits, while the education loan benefits, dialysis  
394 treatment, vocational and return-to-work programmes are restricted to citizens. Migrant  
395 workers also will not be covered under SOCSO's Invalidity Pension Scheme [35].

396 Under the EI scheme, workers with permanent disablements are entitled to periodic payments  
397 of up to 90 percent of the average workers' wage, which is substantially higher than the  
398 maximum lump-sum compensation of RM 23,000 (USD 5,700) offered by the FWCS. In the  
399 instance of a workplace injury or occupational disease, medical expenses at public clinics and  
400 hospitals would be borne by SOCSO, which is unlike provisions under the FWCS, where  
401 employers would first pay for treatment and later be reimbursed from the compensation  
402 amount. The EI scheme also provides temporary disablement benefits of 80 percent of the  
403 average workers' wage for injured workers certified 'unfit' by a medical officer for at least 4  
404 days, not including the day of the accident [32, 34]. (Table 3)

405 **Qualitative 1: FWCS compensation inadequate and administratively lengthy**

406 **FWCS inadequate compensation**

407 Many interviewed complained about the meagre FWCS compensation pay-outs that were  
408 considered as insufficient to reimburse the immediate medical costs of managing acute  
409 injuries, not to mention injuries requiring long-term care or rehabilitation. This interviewee  
410 explained that to avoid excessive medical bills, some employers prefer to send their workers  
411 back to home countries without claiming compensation.

412 *"If there is an injury, the company has to pay the bill first, and then later only, they can claim*  
413 *from the insurance company. So, there is a limit. It is not enough to cover like serious injuries*  
414 *or long term [treatment]. So, after that money finishes and the company just releases the*  
415 *worker."* CSO-1

416 Those interviewed also informed that compensation was grossly insufficient in cases of  
417 death, where the cost of repatriation of deceased workers' bodies would inevitably exhaust  
418 the entire compensation amount.

419 *"For us, this is very much underinsured. Because sometimes, for example, if the worker is*  
420 *from East Indonesia, Timor Leste, those areas [remote regions in Indonesia]. The charges*  
421 *can be as high as RM18,000, just to send the deceased body back. When we deduct all these,*  
422 *very little is left for the deceased family, and this shouldn't happen."* IO-1

423 Compensation amounts were considered especially unjust in case of death and permanent  
424 disability, where lump-sum payments are incomparable to the loss of a lifetime's earnings.

425 **Claiming compensation is a complex process**

426 Interviewees explained that claiming compensation was a lengthy and administratively  
427 complex process. The WCA does not provide detailed guidelines on the procedures necessary

## Results

428 for claiming compensation leading to much confusion. Also, migrant workers could only  
429 claim compensation after they fully recover and have a medical report detailing their injuries.  
430 This interviewee shared that injured workers were forced to support themselves financially  
431 during the recovery period, even though they were unable to work.

432 *“That process takes us, four months to six months, around that [compensation claims]. At*  
433 *that time, he’s not getting a salary. He was staying, just lock himself up in the room, in a*  
434 *rented place. And he has to do dressing and everything.” CSO-3*

### 435 **Employers deduct medical expenses from compensation**

436 Employers are entitled by law to deduct their portion of advanced medical payments from the  
437 compensation amount. As explained by this interviewee, the injured worker may finally  
438 receive very little compensation after deducting employer’s expenses.

439 *“When there is an accident, the cost of medication is very high. So, when they receive the*  
440 *compensation, and then their employer will deduct for the medical expenses that he has*  
441 *borne in advance. You see the worker goes back with nothing. He may have lost his arm or*  
442 *his leg, but he doesn’t get anything else from that.” IO-2*

### 443 **Qualitative 2: Employers reluctant to report workplace accidents which affect** 444 **insurance claims**

445 Compensation claims for FWCS could only be done through the employer. Employers must  
446 initiate the process by reporting workplace accidents resulting in disablement or death to the  
447 Department of Labour within ten days of the accident. Interviewees explained that some  
448 employers were reluctant to report workplace accidents to avoid investigations into  
449 occupational safety practices. This may be due to the perception that insurance claims were  
450 linked to occupational health safety enquiries, as the Department of Safety of Health (DOSHS)  
451 is also part of the Department of Labour.

## Results

452 *“Because the insurance claim is also tied to the DOSH. If the employer makes a report to the*  
453 *Labour Department, DOSH will come into the picture. Suppose there is negligence in the*  
454 *part of the employer, the employer will be fined.” CSO-2*

455 There were various reasons why employers would rather send their workers home after  
456 occupational injuries, rather than initiating compensation claims. While compensation is  
457 notoriously inadequate, employers would also prefer not to be investigated on workplace  
458 safety standards. Others would attempt to preserve industrial reputation, as well as avoid the  
459 inevitable increase in insurance premiums after claims are made.

460 *“He lost his hand. It was the fault of the machine. He has to press a button to hold on to the*  
461 *stamping. So, he put his hand in the stamp [and accidentally] stamped it. So, he lost his whole*  
462 *hand. And he’s the fourth person in that company. So, what normally [happens is], the*  
463 *employer will send them off [back home]” CSO-3*

464 In this case, this interviewee explained that it would be cheaper to send the migrant worker  
465 back to their home country, rather than to conduct a proper enquiry into workplace injuries or  
466 change faulty equipment.

### 467 **Qualitative 3: SOCSO ‘Too early to tell’**

468 While there was a general positive feeling of anticipation for the inclusion of migrant workers  
469 into SOCSO, many of those interviewed felt it was too early to comment on the benefits or  
470 difficulties of SOCSO for migrant workers. This participant explained that SOCSO could  
471 only be properly evaluated after there is a ‘test case’ or an accident that can be claimed.

472 *“By bringing it back in [SOCSO for migrant workers], the problem we face is that it is*  
473 *difficult to implement [and] to administer. But we won't see it until there is an accident, [...]*  
474 *an accident that can be claimed. If there is no accident, then it is just an insurance. You can*



## Results

475 *buy insurance, you won't see anything until you get into an accident - whether the insurance*  
476 *is good or not.” AC-3*

### 477 **Qualitative 4: Potential challenges implementing SOCSO with migrant workers**

#### 478 **No-fault compensation may lead to excess claims**

479 With the ‘no-fault compensation’ migrant workers are not required to prove any negligence  
480 on the part of the employer to receive compensation. Although both FWCS and SOCSO offer  
481 ‘no-fault compensation’, this interviewee made clear that unlike FWCS with its small lump-  
482 sum payment, SOCSO has significantly larger compensation amounts, increasing the  
483 potential for abuse of SOCSO’s provision of ‘no-fault compensation’.

484 *“The idea of ‘no-fault’ compensation is if you cut your finger in the workplace; I don't care*  
485 *whether you cut it purposefully or cut it accidentally. [Or if] it was because your employer*  
486 *didn't provide the care, or it was you who didn't work according to what you are supposed to*  
487 *do. So, it doesn't matter! [Social Security] will pay you.” AC-3*

#### 488 **Uncertainty over the portability of benefits overseas**

489 Unlike FWCS which has lump-sum disbursement of funds, the SOCSO scheme provides for  
490 a mix of lump-sum and periodic disbursements. A concern raised by interviewees was on the  
491 portability of benefits, where administrative difficulties in compensating of migrant workers  
492 or next-of-kin in home countries are anticipated.

493 *"One of the difficulties that they [may] find is in terms of portability and the issue of*  
494 *administration. Sometimes, the migrant worker has got a very permanent [or]serious*  
495 *injuries, he may opt to go back. So, how do you continue compensating him and going for*  
496 *rehabilitation and things like that. " IO-2*

## Results

497 Compensation of returnees or family members in home countries would require close  
498 cooperation and coordination between migrant-sending and receiving countries, including  
499 mechanisms for identifying and contacting recipients and transferring cash payments.  
500 Another issue raised was the availability and adequacy of healthcare in home countries to  
501 deliver medical or rehabilitative treatment promised by the social security scheme.

## 502 **Discussion**

503 To date a security lens has been applied to migration policy in Malaysia [16], however, this  
504 may be changing with the imperative towards achieving the United Nation’s Sustainable  
505 Development Goals [36]. Although government policy requiring health workers to report  
506 undocumented migrants creates a climate of fear around care-seeking among non-citizens  
507 [12], the inclusion of migrant workers into the national social security scheme, SOCSO, is a  
508 promising step towards realising parity of benefits with citizens [37].

509 Citizens’ concerns around resource constraints is a popular narrative in many countries  
510 globally, with common threads of blaming non-citizens for diminishing public resources, like  
511 healthcare, education and housing [38-41]. The majority of Malaysians surveyed in a 2019  
512 study, believed that migrant workers should not receive the same pay or benefits as locals  
513 [42]. Negative public perceptions of migrants are reinforced by discriminatory policies,  
514 which imply that migrants are not worthy of the same welfare provisions as citizens. Public  
515 attitudes also play a role in shaping policy and create difficulty in reallocating domestic  
516 resources towards migrant populations, even when the solutions are shown to be more cost-  
517 effective. A European cost analysis study found significant cost savings through timely  
518 treatments for irregular migrants and uninsured EU citizens in a primary care setting. Timely  
519 treatment in cheaper primary care compared to more expensive hospital care was estimated to  
520 save between 49 to 100 percent of direct medical and non-medical costs of hospitalisations  
521 [43].

522 The economic contributions of migrant workers in Malaysia though significant, are not easily  
523 quantifiable. Beyond alleviating labour shortages and increasing productivity, migrant  
524 workers, like all consumers in Malaysia, pay a consumption tax or the Sales and Services Tax  
525 (SST), a regressive form of indirect taxation. Migrant workers and their employers also

526 contribute in terms of annual levy payments, which may be considered a form of labour tax  
527 [44, 45], not earmarked towards the workers' benefit, generating revenue of close to RM 3  
528 billion (USD 710 million) annually (Table 4). The annual levy is one of many government  
529 fees collected for the employment of migrant workers, which also includes a security bond  
530 which varies by nationality [RM 250 to RM 1,500 (USD 62-USD 372)] [46].

531 We found that both migrant workers and employers lack awareness of SPIKPA enrolment  
532 and entitlements, which may explain its limited uptake. The claim-loss ratios for SPIKPA are  
533 reported to be extremely low, with the pay-outs approximating 10 percent of premium  
534 revenues in 2015 [47]. From the insurance providers' perspective, profits are maximized  
535 when claims rates are low. Therefore, it is not in the insurance providers' interest for migrant  
536 workers to be aware of their SPIKPA entitlements and claim accordingly.

537 This paper questions the adequacy of SPIKPA in providing financial risk protection for  
538 migrant workers, given the high user fees at public hospitals. While the non-citizen user  
539 charges being recouped have increased, unpaid revenues have increased in parallel, raising  
540 the questions of adequacy of insurance coverage. We estimate that revenues of RM 191  
541 million (USD 47 million) in SPIKPA premiums were collected by private insurers from 1.6  
542 million workers in 2019 alone, a staggering sum almost four times the amount of outstanding  
543 revenue in medical fees incurred by non-citizens in government health facilities. We suggest  
544 that the government evaluates the insurance provision for non-citizens and considers  
545 combining all contributions into a common pool under government oversight. Specifically, a  
546 study should be conducted to examine the feasibility of insuring other non-citizen populations  
547 like refugees, asylum seekers and undocumented workers together with documented migrant  
548 workers covered by SPIKPA. REMEDI, an innovative medical insurance scheme for  
549 refugees launched by the United Nations High Commissioner for Refugees (UNHCR),  
550 Malaysia [19, 48], is currently suspended by the private insurer as loss-making due to high

551 claim rates and poor enrolment [49]. Having a larger pool of enrollees in a comprehensive,  
552 government-controlled insurance scheme could present significant cost savings for migrants  
553 and would help the MOH recoup unpaid bills by non-citizens.

554 Undocumented workers and domestic workers are excluded from health and social security  
555 policies, while plantation workers remain excluded from health policies. These groups remain  
556 vulnerable to exploitation and financially catastrophic healthcare expenses. While  
557 undocumented workers are often excluded from public health insurance schemes despite the  
558 cost-savings of enrolment [43, 50, 51]. In Thailand, undocumented workers can enrol in a  
559 MOH-backed dedicated migrant health insurance, although challenges remain [52]. The levy  
560 contributions, if redirected to the MOH, could function as a funding source towards insuring  
561 all migrant populations, including the previously excluded domestic, plantation and  
562 undocumented workers, as well as refugees and asylum seekers. In addition, we urge the  
563 government to consider providing a more comprehensive coverage of outpatient, inpatient  
564 and rehabilitative services across the entire spectrum of healthcare.

565 SOCSO offers higher level protection for workplace accidents compared to FWCS [35],  
566 however, its implementation remains unclear. One issue not communicated is the potential  
567 overlap with SPIKPA, as medical expenses for migrant workers' related workplace injuries  
568 may now be provided under SOCSO. Issues of portability of social security benefits between  
569 migrant sending and receiving countries could be improved through regional and bilateral  
570 partnerships, such as Memorandums of Understanding to enhance referral mechanisms to  
571 ensure the proper management of returnees [53].

572 Deficiencies in domestic legislation apply to Malaysians as well as migrant workers, such as  
573 the lack of health entitlements for workers under the Employment Act [54]. We suggest that  
574 the Employment Act be amended to specify the employer's responsibility for the provision of

575 healthcare for all workers. This revision will benefit everyone, bringing Malaysia in line with  
576 the SDGs and the concept of equality of benefits.

577 Currently, migrant workers are regulated through immigration laws enforced by the Ministry  
578 of Home Affairs (MOHA) and labour laws enforced by the Ministry of Human Resources  
579 (MOHR), with health and welfare seemingly of secondary concern. Importantly, considering  
580 the recent re-emergence of polio among migrant populations in the Eastern Malaysian state of  
581 Sabah, health should be at the forefront of migration policy [55]. The government should  
582 consider establishing a cabinet-level ‘Migrant Working Group’ with representatives from  
583 each Ministry, to facilitate discussion and movement towards a ‘Health in All’ policies  
584 approach.

585 This study has some limitations. We may have incurred selection bias by sampling known  
586 participants during the initial purposive sampling of attendees of a migrant health stakeholder  
587 workshop. Nevertheless, we were able to mitigate this by subsequent snow-ball sampling and  
588 contacting stakeholders via LinkedIn. We were mindful that participants may have been  
589 providing socially acceptable responses particularly towards sensitive questions, thus we  
590 were careful to ask open-ended questions in a non-confrontational manner, and triangulated  
591 findings by interviewing different stakeholders and document review. While the qualitative  
592 nature of this study prevents generalisation of findings, we were able to gain perspective of  
593 ‘real world’ challenges faced by migrant workers with health financing and social security  
594 schemes through the experience of diverse stakeholders, including migrant workers and their  
595 representatives, employers and health professionals. This policy analysis is unique as it  
596 combines qualitative interviews with document review and examination of the economic  
597 evidence, to examine the adequacy of available healthcare financing and social security  
598 schemes for migrant workers in Malaysia. We have suggested multi-stakeholder policy  
599 interventions both in Malaysia and in migrant-sending countries.

600 **Table 4: Estimated annual levies collected for migrant workers by sector, 2019**

601

| <b>SECTOR</b> | <b>Workers<br/>(Peninsular)</b> | <b>Workers<br/>(Sabah/ Sarawak)</b> | <b>Levy <sup>1</sup><br/>(Peninsular)</b> | <b>Levy <sup>1</sup><br/>(Sabah/ Sarawak)</b> | <b>Total Levy<br/>(Malaysia)<br/>(millions)</b> |
|---------------|---------------------------------|-------------------------------------|-------------------------------------------|-----------------------------------------------|-------------------------------------------------|
| Manufacturing | 659,925                         | 39,505                              | RM 1,850<br>(USD 458)                     | RM 1,010<br>(USD 250)                         | RM 1,261<br>(USD 313)                           |
| Construction  | 410,665                         | 27,599                              | RM 1,850<br>(USD 458)                     | RM 1,010<br>(USD 250)                         | RM 788<br>(USD 195)                             |
| Plantation    | 150,228                         | 122,851                             | RM 640<br>(USD 159)                       | RM 590<br>(USD 146)                           | RM 169<br>(USD 42)                              |
| Agriculture   | 117,077                         | 39,257                              | RM 640<br>(USD 159)                       | RM 410<br>(USD 102)                           | RM 191<br>(USD 23)                              |
| Services      | 289,421                         | 16,731                              | RM 1,850<br>(USD 458)                     | RM 1,490<br>(USD 369)                         | RM 560<br>(USD 139)                             |
| Domestic work | 118,403                         | 10,765                              | -                                         | -                                             | -                                               |
| <b>TOTAL</b>  | <b>1,745,719</b>                | <b>256,708</b>                      |                                           | <b>RM 181<br/>(USD 45)</b>                    | <b>RM 2,868<br/>(USD 711)</b>                   |

602 <sup>1</sup> Levies vary by employment sector and employment in Peninsular Malaysia or Sabah and Sarawak in East Malaysia.

603 All costs are reported in 2018 Malaysian Ringgit (RM) and United States Dollars (USD).

604 Source: [7, 46]

605

## 606 **Conclusion**

607 Migrant health policy in Malaysia, like many other countries worldwide, embodies the  
608 conflict between state sovereignty, healthcare rationing and international commitments  
609 towards maintaining health and social security for the entire population, including migrant  
610 workers. Malaysia is moving towards a more inclusive approach for improved population  
611 health, with the provision of SOCSO for documented migrant workers, but more needs to be  
612 done. Here we suggest the expansion of the SPIKPA insurance scheme to include all migrant  
613 populations in Malaysia and broadening of its scope towards more comprehensive coverage,  
614 including essential primary care services.



## References

- 616 1. IOM The UN migration agency. World Migration Report 2020. Geneva, Switzerland.  
617 496 p.
- 618 2. International Labour Organization. ILO Global Estimates on International Migrant  
619 Workers – Results and Methodology. Geneva: ILO, 2018.
- 620 3. The Global Compact for Safe, Orderly and Regular Migration, A/RES/73/195, (2018).
- 621 4. Tulloch O, Machingura F, Melamed C. Health, migration and the 2030 Agenda for  
622 Sustainable Development. 2016.
- 623 5. UNDP. The Right to Health. Right to Health for low-skilled labour migrants in  
624 ASEAN countries. Bangkok: UNDP, 2015.
- 625 6. Department of Statistics Malaysia. Key Statistics of Labour Force in Malaysia, July  
626 2018. 2018.
- 627 7. Number of Foreign Workers by State and Sector until June 30, 2019 [Internet]. [cited  
628 January 12, 2020]. Available from: [http://www.data.gov.my/data/ms\\_MY/dataset/statistik-  
629 pekerja-asing-terkini-mengikut-negeri-dan-sektor](http://www.data.gov.my/data/ms_MY/dataset/statistik-pekerja-asing-terkini-mengikut-negeri-dan-sektor).
- 630 8. Counting Migrant Workers in Malaysia: A Needlessly Persisting Conundrum  
631 [Internet]. ISEAS – Yusof Ishak Institute 2018. Available from:  
632 [https://www.iseas.edu.sg/articles-commentaries/iseas-perspective/item/7354-201825-  
633 counting-migrant-workers-in-malaysia-a-needlessly-persisting-conundrum](https://www.iseas.edu.sg/articles-commentaries/iseas-perspective/item/7354-201825-counting-migrant-workers-in-malaysia-a-needlessly-persisting-conundrum).
- 634 9. Jaafar S, Noh KM, Muttalib KA, Othman N, Healy J. Malaysia Health System  
635 Review. Geneva, Switzerland: World Health Organization (on behalf of Asia Pacific  
636 Observatory on Health Systems and Policies), 2013 Contract No.: 1
- 637 10. Health Ministry hikes up hospital fees for foreigners up to 230pc. Malay Mail. 8 April  
638 2017.
- 639 11. Official Website of Hospital Kuala Lumpur. Ministry of Health M. Hospital Charges,  
640 Deposits and Discharges. 2018.
- 641 12. Loganathan T, Rui D, Ng C-W, Pocock NS. Breaking down the barriers:  
642 Understanding migrant workers' access to healthcare in Malaysia. PLOS ONE.  
643 2019;14(7):e0218669. doi: 10.1371/journal.pone.0218669.
- 644 13. Ministry of Health Malaysia. Circular of the Financial Division No.1/2011:  
645 Procedures for the administration of hospital admissions and medical claims for foreign  
646 workers under the Foreign Workers Health Insurance Scheme (SPIKPA) at Ministry of  
647 Health Malaysia hospitals. 2011.
- 648 14. Employees' Social Security Act, 1969 (Act 4).
- 649 15. Workmen's Compensation Act, (1952).
- 650 16. Devadason ES, Meng CW. Policies and laws regulating migrant workers in Malaysia:  
651 A critical appraisal. Journal of Contemporary Asia. 2014;44(1):19-35.
- 652 17. Key Migration Terms [Internet]. 2018 [cited 28 August 2019]. Available from:  
653 <https://www.iom.int/key-migration-terms>.
- 654 18. IOM The UN migration agency. no. 34 International Migration Law: Glossary on  
655 migration. 2019.
- 656 19. Pocock NS, Suphanchaimat R, Chan CK, Faller EM, Harrigan N, Pillai V, et al.,  
657 editors. Reflections on migrant and refugee health in Malaysia and the ASEAN region 2018:  
658 BioMed Central.
- 659 20. Braun V, Clarke V. Using thematic analysis in psychology. Qualitative research in  
660 psychology. 2006;3(2):77-101.
- 661 21. Ministry of Health Malaysia. Annual Report 2008 - 2018.

- 662 22. World Bank, Official exchange rate (LCU per US\$, period average) [Internet]. 2018  
663 [cited 23 January 2020]. Available from:  
664 <https://data.worldbank.org/indicator/PA.NUS.FCRF?end=2017&start=2017&view=bar>.
- 665 23. Ministry of Health Malaysia. Circular of the Secretary General of the Ministry of  
666 Health Malaysia no. 2/2019: Implementation Guidelines of the Fee Order (Medical) (Cost of  
667 Service) 2014. 2019.
- 668 24. PERKESO. Employer's Circular No. 3 Year 2018: Transfer Of Foreign Workers'  
669 Coverage From The Foreign Workers Compensation Scheme (FWCS), The Department Of  
670 Labour To SOCSO Employment Injury Scheme. 2018.
- 671 25. Ministry of Health Malaysia. Circular of the Director General of Health no.10/2001:  
672 Guidelines for reporting illegal immigrants obtaining medical services at clinics and  
673 hospitals. . 2001.
- 674 26. Act 153. Immigration Act 1959/63.
- 675 27. Fees Act 1951, Fees (Medical) (Cost of Services) Order 2014
- 676 28. Ministry of Health Malaysia. Circular of the Secretary General, Ministry of Health,  
677 Malaysia no. 8/2015: Implementation of full charges Fees Order (Medical) (Service cost)  
678 2014. 2015.
- 679 29. Ministry of Health Malaysia. Ammendment to the guidelines for the supply of  
680 medication to non-citizen patients at Ministry of Health facilities. 2017.
- 681 30. Nordin R, Abd Razak MF, Shapiee R, Tengku Zainuddin TNA, Md Auzair S, Jaffar  
682 R. Health Insurance for Foreign Workers in Malaysia and Singapore: A comparative study.  
683 International Journal of Business and Society. 2018;19 (S3):400-13.
- 684 31. Bar Council Malaysia. Migrant Workers' Access to Justice: Malaysia. Kuala Lumpur,  
685 Malaysia: Bar Council Malaysia; 2019.
- 686 32. ILO. Individual Case (CAS) - Discussion: 2017, Publication: 106th ILC session  
687 (2017). Equality of Treatment (Accident Compensation) Convention, 1925 (No. 19) -  
688 Malaysia - Peninsular (Ratification: 1957).
- 689 33. C019 - Equality of Treatment (Accident Compensation) Convention, 1925 (No. 19),  
690 (1925).
- 691 34. PERKESO. Frequently Asked Questions on the transfer of the foreign workers  
692 compensation Scheme (FWCS) from the Department of Labour (JTK) to Social Security  
693 Organisation's (SOCSO) Employment Injury (EI) Scheme. 2019.
- 694 35. Social Security Organisation. Better Coverage for Foreign Workers. The Sun Daily.  
695 2019 13th May 2019.
- 696 36. Kieny MP, Bekedam H, Dovlo D, Fitzgerald J, Habicht J, Harrison G, et al.  
697 Strengthening health systems for universal health coverage and sustainable development.  
698 Bulletin of the World Health Organization. 2017;95(7):537.
- 699 37. Opalyn Mok. Foreign workers to be covered under Socso, says Kulasegaran. The  
700 Malay Mail. 2018 25th October 2018.
- 701 38. Berry M, Garcia-Blanco I, Moore K. Press coverage of the refugee and migrant crisis  
702 in the EU: A content analysis of five European countries. United Nations High Commissioner  
703 for Refugees, 2016.
- 704 39. Tunon M, Baruah N. Public attitudes towards migrant workers in Asia. Migration and  
705 Development. 2012;1(1):149-62. doi: 10.1080/21632324.2012.718524.
- 706 40. ILO ROAP. ILO four-country study on public attitudes to migrant workers. Bangkok:  
707 ILO Regional Office for Asia and the Pacific, 2011.
- 708 41. Dempster H, Hargrave K. Understanding public attitudes towards refugees and  
709 migrants. ODI Chatam House 2017.
- 710 42. International Labour Organization, UN Women. Public attitudes towards migrant  
711 workers in Japan, Malaysia, Singapore, and Thailand. Geneva, Switzerland: ILO; 2019.

- 712 43. Trummer U, Novak-Zezula S, Renner A, Wilczewska I. Cost analysis of health care  
713 provision for irregular migrants and EU citizens without insurance. 2016 2018. Report No.:  
714 1101-1262.
- 715 44. ILO Regional Office for Asia and the Pacific. Review of labour migration policy in  
716 Malaysia. Tripartite Action to Enhance the Contribution of Labour Migration to Growth and  
717 Development in ASEAN (TRIANGLE II Project) Bangkok: ILO, 2016.
- 718 45. Chan Chee Khoon. Re-balancing ASEAN Integration: Medical Tourism vs Migrants'  
719 Health? . Thinking ASEAN 2017 August 2017:15-7.
- 720 46. Foreign Workers: Fees for VP(TE) extension [Internet]. [cited 1 January 2019].  
721 Available from: <https://www.imi.gov.my/index.php/en/main-services/foreign-workers.html>.
- 722 47. Atun R, Berman P, Hsiao W, Myers E, Wei AY. Malaysia Health Systems Research  
723 Volume 1: Contextual Analysis of the Malaysian Health System. Ministry of Health Malaysia  
724 and Harvard TH Chan School of Public Health. 2016.
- 725 48. Chuah FLH, Tan ST, Yeo J, Legido-Quigley H. Health System Responses to the  
726 Health Needs of Refugees and Asylum-seekers in Malaysia: A Qualitative Study.  
727 International journal of environmental research and public health. 2019;16(9):1584.
- 728 49. Asia Pacific Refugee Rights Network (APRRN). Country Factsheet: Malaysia 2018  
729 [February 19, 2020]. Available from: [http://aprrn.info/wp-content/uploads/2018/09/APRRN-  
730 Country-Factsheet-Malaysia-4-Sept-2018.pdf](http://aprrn.info/wp-content/uploads/2018/09/APRRN-Country-Factsheet-Malaysia-4-Sept-2018.pdf).
- 731 50. Woodward A, Howard N, Wolffers I. Health and access to care for undocumented  
732 migrants living in the European Union: a scoping review. Health Policy Plan.  
733 2014;29(7):818-30. Epub 2013/08/21. doi: 10.1093/heapol/czt061. PubMed PMID:  
734 23955607; PubMed Central PMCID: PMC4186209.
- 735 51. Keith L, Van Ginneken E. Migrant Health: Restricting access to the NHS for  
736 undocumented migrants is bad policy at high cost. The BMJ. 2015;350.
- 737 52. Suphanchaimat R, Kantamaturapoj K, Putthasri W, Prakongsai P. Challenges in the  
738 provision of healthcare services for migrants: a systematic review through providers' lens.  
739 BMC Health Services Research. 2015;15(1):390. doi: 10.1186/s12913-015-1065-z.
- 740 53. Olivier MP. Social Protection for Migrant Workers in ASEAN: Developments,  
741 Challenges, and Prospects. ILO Regional Office for Asia and the Pacific, 2018.
- 742 54. Employment Act (1955 ).
- 743 55. Tharani Loganathan, Kheng. KS. Vaccines and non-citizens: The 'Health for All'  
744 approach The Sun Daily. 2019 December 16, 2020.

745

746

747

748



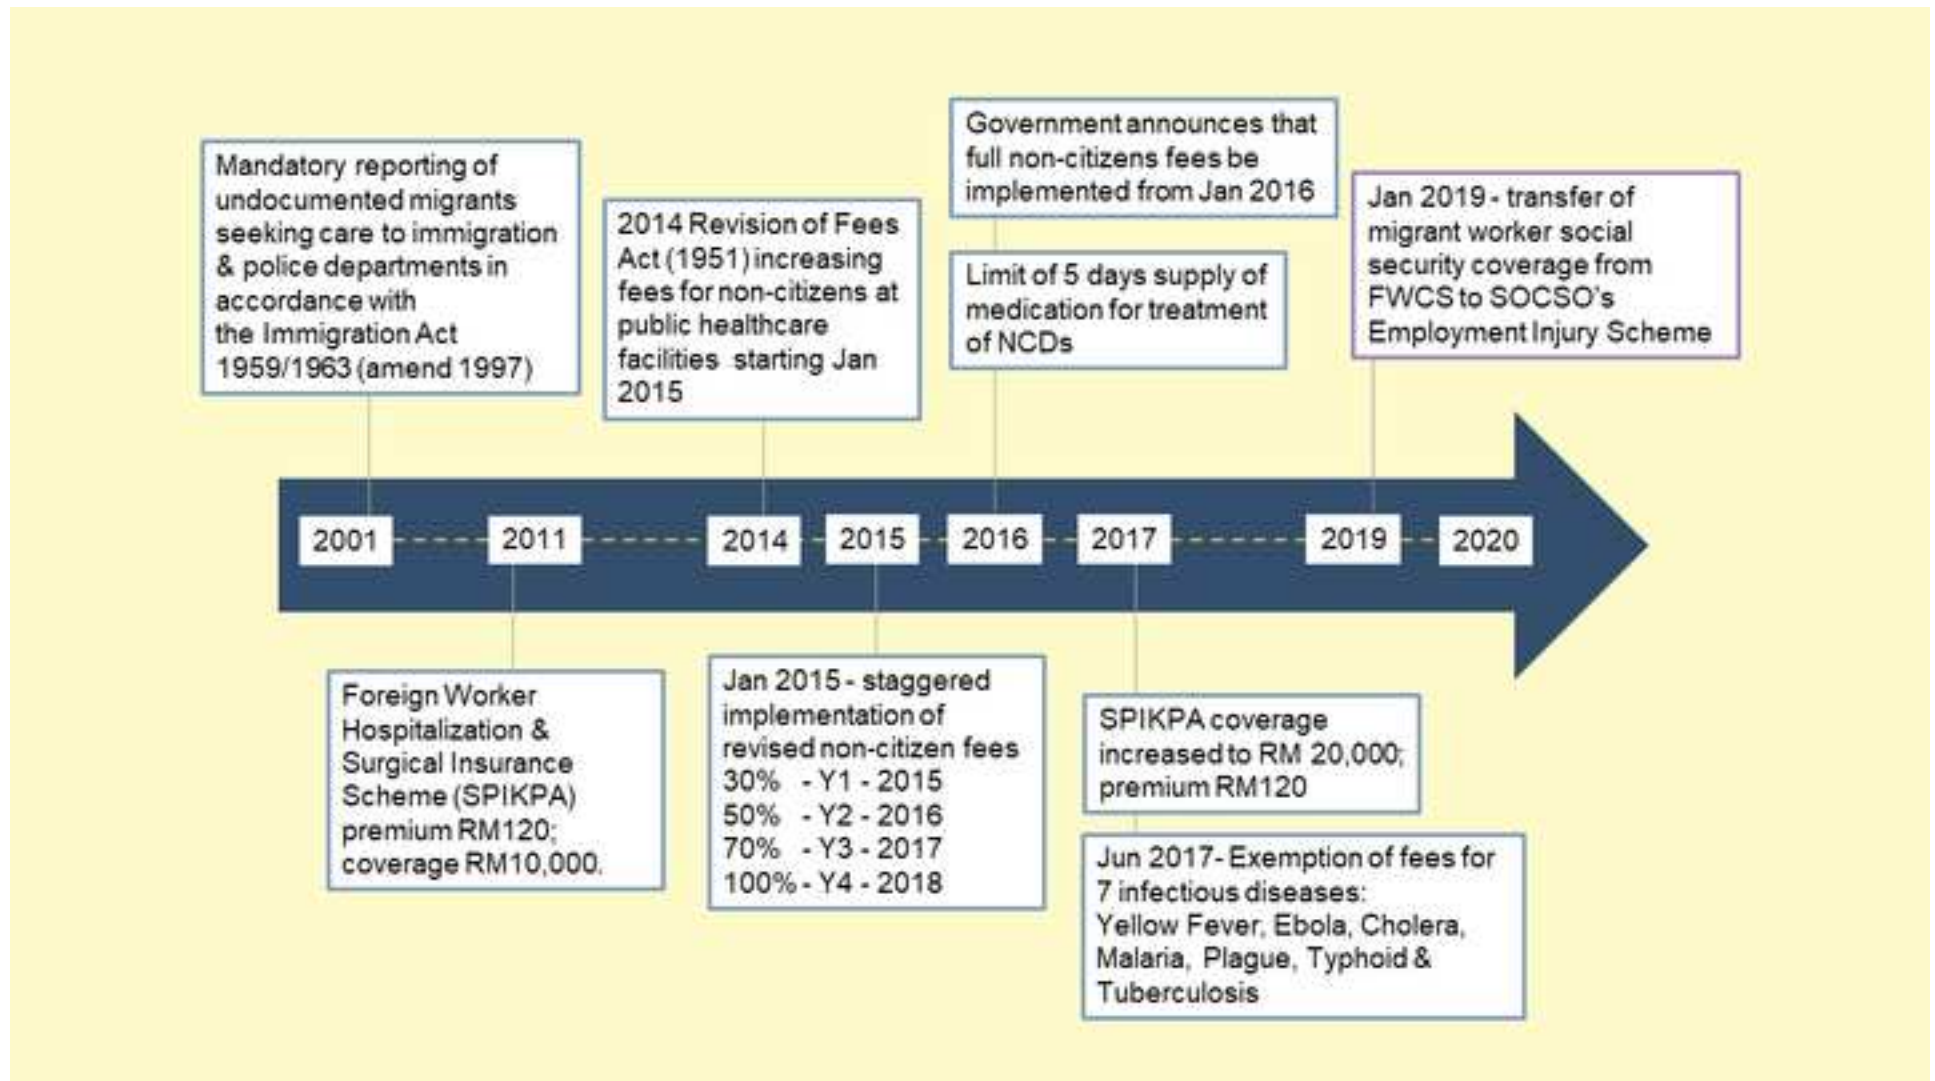

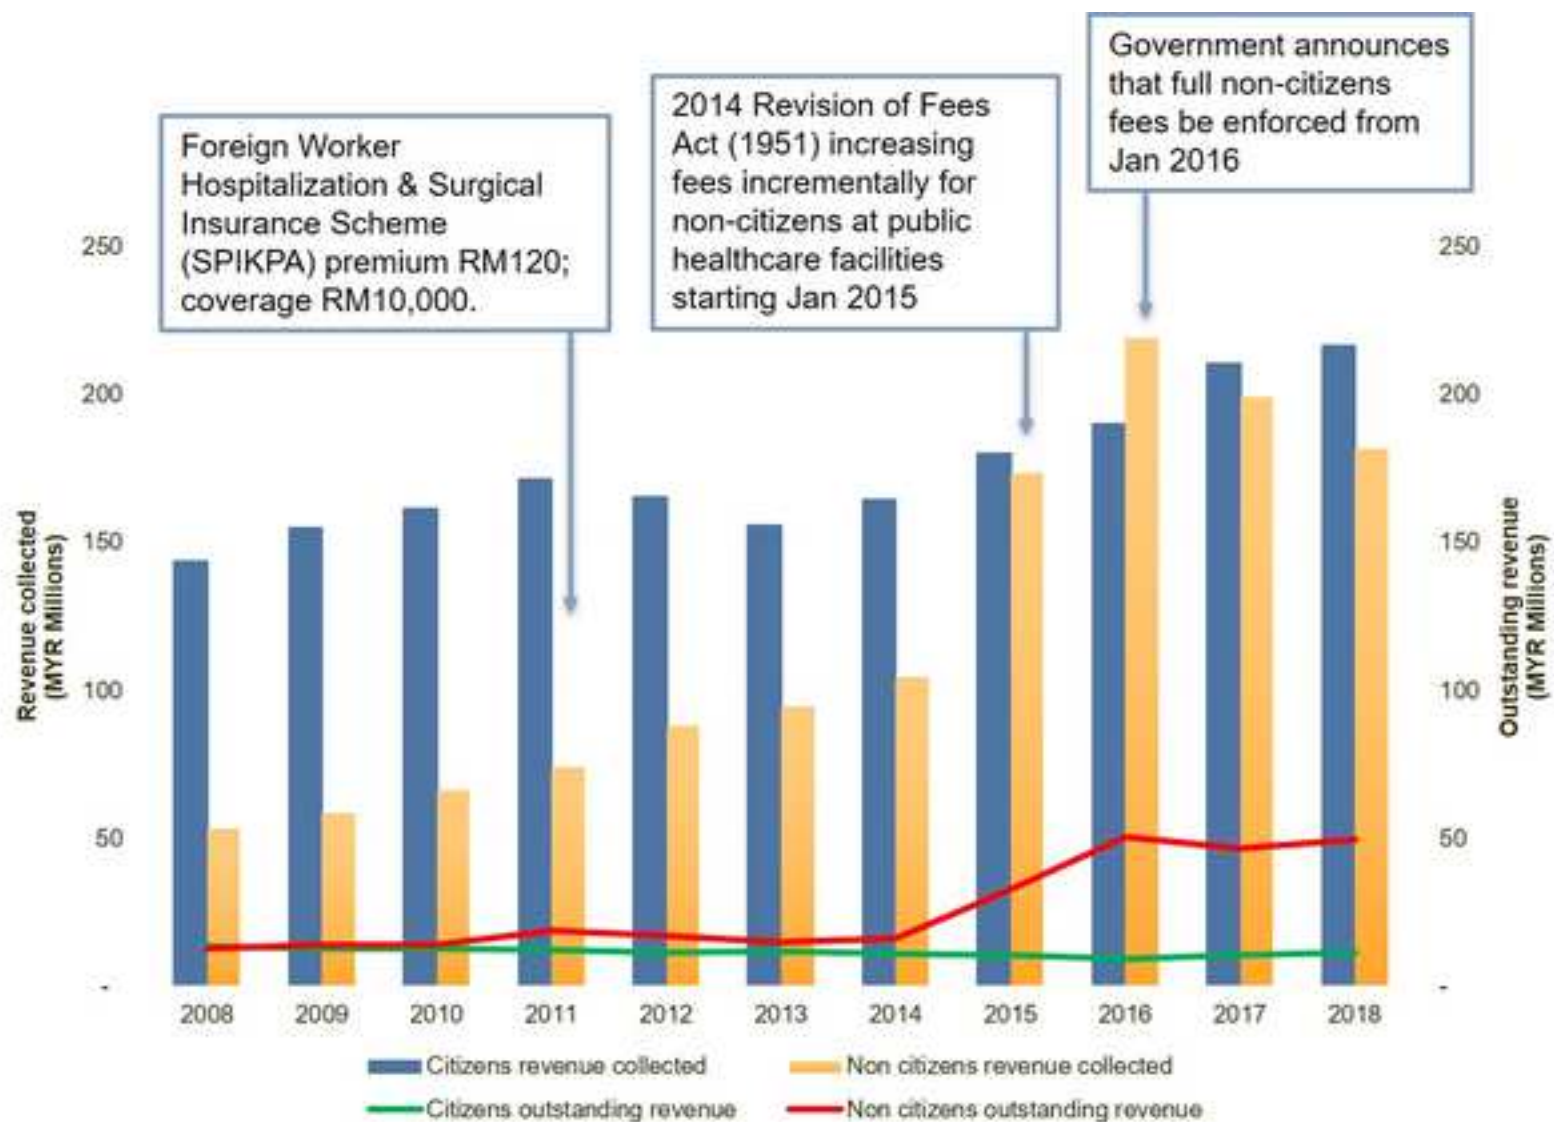

Supplement: pone.0243629.s005.pdf [file pone.0243629.s005.pdf]
